# Supplementary material for: Characterization of Fish Gelatin Obtained from Atlantic Cod Skin Using Enzymatic Treatment
Source: MDPI journal article supplement (doi:10.3390/polym14040751), 2022-02-15
Supplement: s1 [file s1]

## Supplementary information

### S1: Creep and recovery curves obtained at different stresses

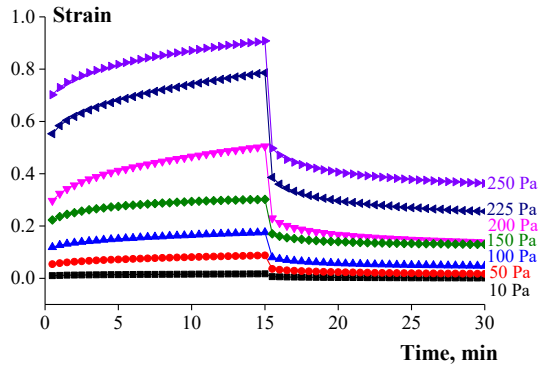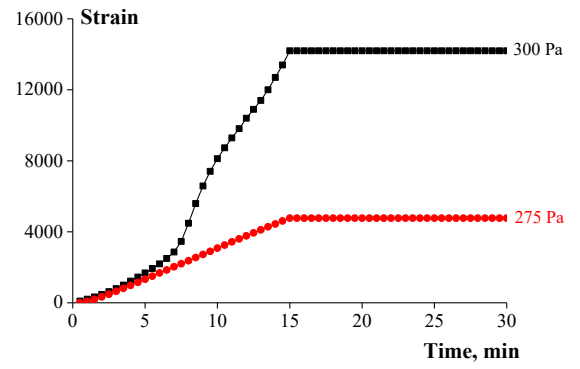

(a)

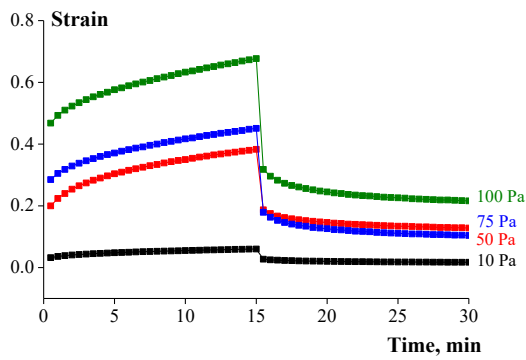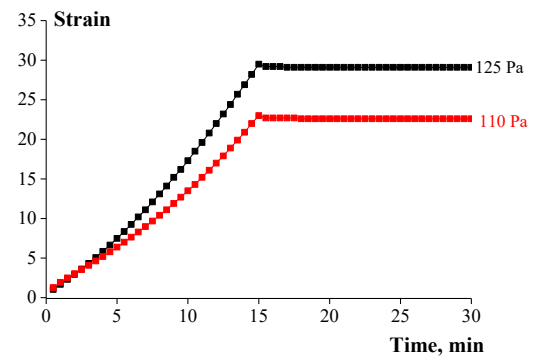

(b)

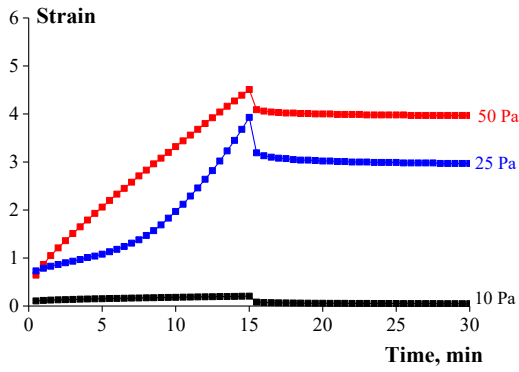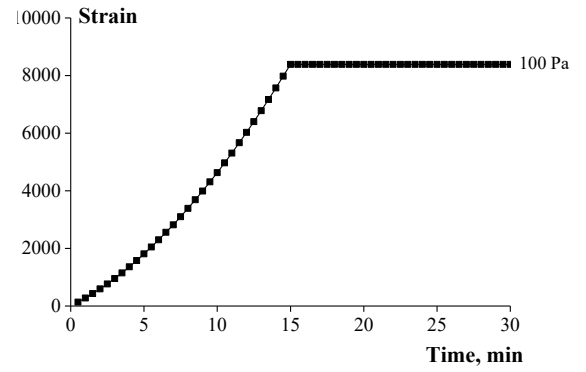

(c)

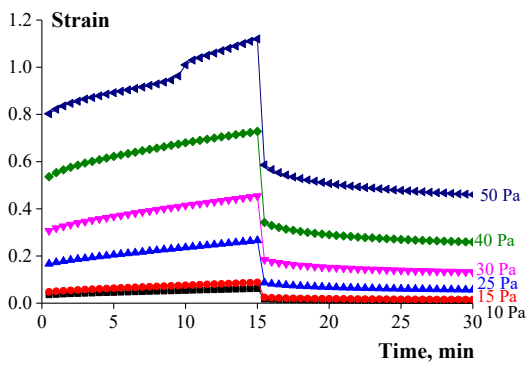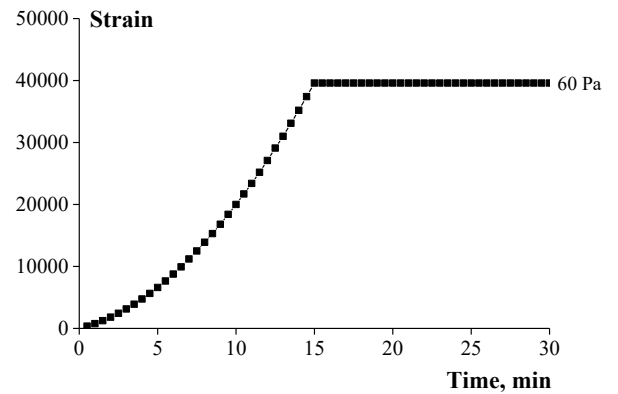

(d)

**Figure S1.** Compliance in loading (left side,  $t = 0-15$  min) and recovery (right side,  $t = 15-30$  min) with time at  $T = 6$  °C and different stresses ( $\sigma$ , Pa), where: a—G1; b—G2; c—G3; d—G 7041. Gelatin concentration was 10 wt.%.
